# Supplementary material
Source: PubMed Central journal article supplement (PMC3053984)
Supplement: 1013098108_pnas.201013098SI.pdf [file 1013098108_pnas.201013098SI.pdf]

# Supporting Information

## Wong and Reiter 10.1073/pnas.1013098108

### SI Materials and Methods

**Animal Strains.** Alleles used in this study were an inducible activated allele of *Smo*, *SmoM2* (*Gt(ROSA)26Sor<sup>tm1(SmoM2/EYFP)Amc</sup>*) (1); an inducible Cre under the control of the *Keratin-15* promoter, *K15-Cre<sup>PR1</sup>* (*Tg(Krt15-cre/PGR)22Cot*) (2); an inducible Cre under the control of the *Keratin-14* promoter, *K14-Cre<sup>ERT</sup>* (*Tg(KRT14-cre/ERT)20Efu*) (3); the *LacZ* reporter of Cre activity (*R26R*, *Gtrosa26<sup>tm1Sor</sup>*) (4); and the Hh pathway reporter *Ptch1-LacZ* (*Ptch1<sup>tm1Mps</sup>*) (5).

**Histology.** Skin biopsies were fixed overnight in formalin for H&E staining or immunohistochemical staining. For YFP and cilia staining, biopsies were fixed for 1 h in 4% paraformaldehyde at 4 °C, then sunk in 30% sucrose overnight for OCT embedding. For whole-mount  $\beta$ -galactosidase ( $\beta$ -Gal) staining, skin and wound sites were removed, cleared of adipose tissue, fixed in 0.2% glutaraldehyde/2% paraformaldehyde for 30 min at 4 °C, and then incubated for 48 h in 1 mg/mL X-Gal (Invitrogen) diluted in 5 mM potassium ferrocyanide and 5 mM potassium ferricyanide. For on-slide  $\beta$ -Gal staining, skin biopsies were embedded directly into OCT. Frozen sections were fixed in 0.5% glutaraldehyde for 5 min, then stained with X-Gal, as above, before counterstaining with Nuclear Fast Red solution (Sigma-Aldrich).

**Immunohistochemistry.** Antibodies used for immunohistochemistry included those raised against Keratin-15 (LHK15, 1:50; Abcam), Keratin-5 (1:500; American Research Products), Sox9 (H-90, 1:25; Santa Cruz Biotechnology), NFATc1 (1:25; BD Biosciences), CD34 (1:10, BD Biosciences), P-cadherin (PCD1, 1:200; Invitrogen), GFP/YFP for detection of SmoM2 (GFP-1020, 1:500; Aves Labs), Gli2 (AB7195, 1:500; Abcam), Arl13b

(1:5,000, gift of T. Caspary, Emory University, Atlanta, GA),  $\beta$ -catenin (Clone 6B3, 1:50; Cell Signaling Technologies; or Clone 14, 1:50; BD Biosciences), and phosphorylated H3S10 (1:200; Cell Signaling Technologies). All imaging was performed with a C1si Spectral Confocal microscope (Nikon Instruments) and NIS-Elements software (Nikon).

**In Situ Hybridization.** In situ staining was performed on formalin-fixed, paraffin-embedded sections using probes for *Axin2* (gift of Y. Choe, University of California San Francisco) and *Gli1* (EST W65013). Slides were dewaxed and rehydrated, permeabilized with proteinase K, postfixed with paraformaldehyde, acetylated, and probed overnight at 60 °C. Slides were subsequently probed with anti-digoxigenin antibody conjugated to alkaline phosphatase (Roche Applied Science), and detected with 5-Bromo-4-chloro-3'-indolylphosphate P-toluidine salt/Nitro-blue tetrazolium chloride (BCIP/NBT) chromogen solution (Roche Applied Science).

**Quantitation.** For quantitation of K14-Cre<sup>ERT</sup> and K15-Cre<sup>PR1</sup> activities, on-slide  $\beta$ -Gal staining was performed on skin biopsies 3 d after induction, and randomized fields from 10- $\mu$ m sections were analyzed. The bulge and SHG was defined as the domain of cells located below the level of the sebaceous glands in telogen hair follicles. Quantitation was performed using NIS-Elements software (AR 3.2; Nikon). For quantitation of neoplastic downgrowths, clusters of cells protruding into the dermis from the IFE of unwounded skin or from the healed wound epithelium were counted in 8- $\mu$ m H&E slides and normalized for the length of skin analyzed. All error bars show SE. *P* values were calculated at <http://www.physics.csbsju.edu/stats/Index.html>.

1. Mao J, et al. (2006) A novel somatic mouse model to survey tumorigenic potential applied to the Hedgehog pathway. *Cancer Res* 66:10171–10178.
2. Morris R-J, et al. (2004) Capturing and profiling adult hair follicle stem cells. *Nat Biotechnol* 22:411–417.
3. Vasioukhin V, Degenstein L, Wise B, Fuchs E (1999) The magical touch: Genome targeting in epidermal stem cells induced by tamoxifen application to mouse skin. *Proc Natl Acad Sci USA* 96:8551–8556.

4. Soriano P (1999) Generalized lacZ expression with the ROSA26 Cre reporter strain. *Nat Genet* 21:70–71.
5. Goodrich L-V, Milenković L, Higgins K-M, Scott M-P (1997) Altered neural cell fates and medulloblastoma in mouse patched mutants. *Science* 277:1109–1113.







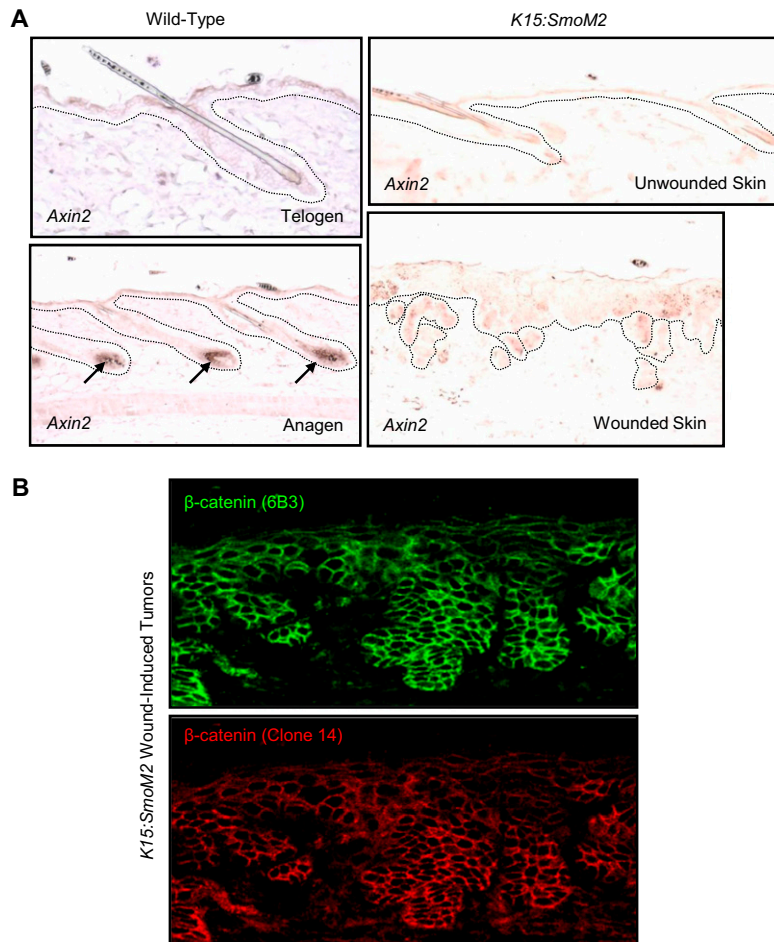

**Fig. 56.** (A *Left*) In situ staining for *Axin2* in wild-type telogen and anagen hair follicles. *Axin2* is expressed mostly in the matrix (arrows). (*Right*) In situ staining for *Axin2* in *K15:SmoM2* intact skin or wound-induced tumors. Dotted lines delineate the epidermal-dermal junction. (B) Immunohistochemical staining for  $\beta$ -catenin using two independent antibodies in *K15:SmoM2* wound-induced tumors.

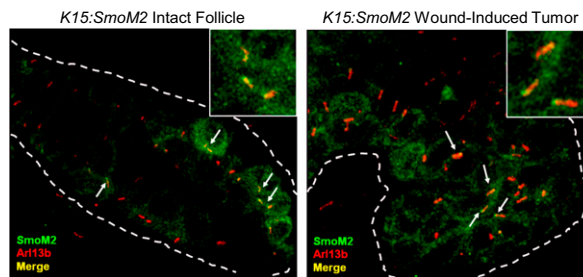

**Fig. 57.** Immunofluorescence staining of intact follicular bulge cells (*Left*) and wound-induced tumors (*Right*) in *K15:SmoM2* skin, showing SmoM2 localization to primary cilia, as visualized by costaining for the ciliary protein Arl13b. (*Insets*) Magnified views showing SmoM2 at the cilium.
